# Supplementary material for: Assessing the Knowledge Level, Attitudes, Risky Behaviors and Preventive Practices on Sexually Transmitted Diseases among University Students as Future Healthcare Providers in the Central Zone of Malaysia: A Cross-Sectional Study
Source: MDPI journal article supplement (doi:10.3390/ijerph14020159), 2017-02-08
Supplement: s1 [file s1]

# Supplementary Materials: Assessing the Level of Knowledge, Attitudes, Risky Behaviors and Preventive Practices on Sexually Transmitted Diseases among University Students as Future Health Care Providers in the Central Zone of Malaysia: A Cross-Sectional Study

Adigun Temiloluwa Folasayo, Afolayan John Oluwasegun, Suhailah Samsudin, Siti Nor Sakinah Saudi, Malina Osman and Rukman Awang Hamat

**Table S1.** Socio-demographic characteristics of the health and non-health university students in this study.

| Variables              | N   | %    |
|------------------------|-----|------|
| Gender                 | -   | -    |
| Male                   | 255 | 36.4 |
| Female                 | 445 | 63.6 |
| Age Group (in years) * | -   | -    |
| 17–23                  | 483 | 69.1 |
| 24–30                  | 216 | 30.9 |
| Ethnicity              | -   | -    |
| Malay                  | 371 | 53.0 |
| Chinese                | 137 | 19.6 |
| Indian                 | 65  | 9.3  |
| Others                 | 127 | 18.1 |
| Educational Level      | -   | -    |
| Undergraduate          | 548 | 78.3 |
| Postgraduate           | 152 | 21.7 |
| Religion               | -   | -    |
| Islam                  | 410 | 58.6 |
| Hindu                  | 66  | 9.4  |
| Buddhist               | 103 | 14.7 |
| Christian              | 121 | 17.3 |
| Faculty Type           | -   | -    |
| Health Sciences        | 300 | 42.9 |
| Non-Health Sciences    | 400 | 57.1 |

\* Only one student did not complete this information.

**Table S2.** Sources from which the university students obtained their STD information.

| Source             | Frequency | %    |
|--------------------|-----------|------|
| Internet           | 541       | 77.3 |
| Newspaper/Magazine | 446       | 63.8 |
| Television         | 396       | 56.6 |
| Radio              | 227       | 32.4 |
| Seminar            | 295       | 42.1 |
| School curriculum  | 360       | 51.4 |
| Family             | 238       | 34.0 |
| Friends            | 325       | 46.4 |
| Pamphlet           | 314       | 44.9 |
| Signboard          | 240       | 34.3 |
| Health Center      | 399       | 57.0 |

**Table S3.** Multiple logistic regression predicting university students' knowledge level on STDs.

| Variable             | $\beta$ | <i>p</i> -Value | Adjusted Odds Ratio | 95% CI      |
|----------------------|---------|-----------------|---------------------|-------------|
| Constant             | -       | 0.001           | 2.174               | -           |
| Gender               | -       | -               | -                   | -           |
| Male                 | 0.027   | 0.882           | 1.027               | 0.722–1.460 |
| Female               | -       | -               | -                   | -           |
| Age group (in years) | -       | -               | -                   | -           |
| 17–23                | −0.564  | 0.007 *         | 0.569               | 0.377–0.859 |
| 24–30                | -       | -               | -                   | -           |
| Education level      | -       | -               | -                   | -           |
| Undergraduate        | −0.205  | 0.380           | 0.815               | 0.515–1.788 |
| Postgraduate         | -       | -               | -                   | -           |
| Faculty type         | -       | -               | -                   | -           |
| Health Sciences      | 1.739   | 0.001 *         | 5.690               | 4.019–8.057 |
| Non-Health Sciences  | -       | -               | -                   | -           |

Note: Method = enter;  $R^2 = 21.5\%$ ; overall percentage = 69.2%; \* significant at  $p < 0.05$ .

**Table S4.** Association between preventive practices level and socio-demographic characteristics and knowledge level of the students related to STDs.

| Variables                           | Practices Level (%) |              | <i>n</i> (%) | $\chi^2$ | <i>p</i> | Prevalence Ratio (C.I) |
|-------------------------------------|---------------------|--------------|--------------|----------|----------|------------------------|
| -                                   | Acceptable          | Unacceptable | -            | -        | -        | -                      |
| Gender ( <i>n</i> = 138)            | -                   | -            | -            | -        | -        | -                      |
| Male                                | 23 (26.4)           | 64 (73.6)    | 87 (62.6)    | 0.231    | 0.631    | 0.876 (0.511–1.501)    |
| Female                              | 16 (30.2)           | 37 (69.8)    | 53 (37.4)    | -        | -        | -                      |
| Age group ( <i>n</i> = 139)         | -                   | -            | -            | -        | -        | -                      |
| 17–23                               | 18 (31.6)           | 39 (68.4)    | 57 (41.0)    | 0.663    | 0.416    | 1.363 (0.733–1.137)    |
| 24–30                               | 21 (25.3)           | 62 (74.7)    | 83 (59.0)    | -        | -        | -                      |
| Educational Level ( <i>n</i> = 139) | -                   | -            | -            | -        | -        | -                      |
| Undergraduate                       | 25 (31.3)           | 55 (68.8)    | 80 (56.8)    | 1.069    | 0.301    | 1.339 (0.763–2.350)    |
| Postgraduate                        | 14 (23.3)           | 46 (76.7)    | 60 (43.2)    | -        | -        | -                      |
| Faculty Type ( <i>n</i> = 139)      | -                   | -            | -            | -        | -        | -                      |
| Health Sciences                     | 8 (25.8)            | 23 (74.2)    | 31 (21.6)    | 0.083    | 0.773    | 0.907 (0.466–1.768)    |
| Non-Health Sciences                 | 31 (28.4)           | 78 (71.6)    | 109 (78.4)   | -        | -        | -                      |
| Ethnicity ( <i>n</i> = 138)         | -                   | -            | -            | -        | -        | -                      |
| Malay                               | 14 (35.0)           | 26 (65.0)    | 40 (28.8)    | 1.422    | 0.233    | 1.400 (0.814–2.407)    |
| Non-Malay                           | 25 (25.0)           | 75 (75.0)    | 100 (71.2)   | -        | -        | -                      |
| Religion ( <i>n</i> = 139)          | -                   | -            | -            | -        | -        | -                      |
| Muslim                              | 22 (31.4)           | 48 (68.6)    | 70 (50.0)    | 0.889    | 0.346    | 1.294 (0.755–2.219)    |
| Non-Muslim                          | 14 (24.3)           | 53 (75.7)    | 70 (50.0)    | -        | -        | -                      |
| Knowledge Level ( <i>n</i> = 139)   | -                   | -            | -            | -        | -        | -                      |
| Good                                | 18 (25.0)           | 54 (75.0)    | 71 (51.1)    | 0.602    | 0.438    | 1.235 (0.723–2.110)    |
| Poor                                | 21 (30.9)           | 47 (69.1)    | 68 (48.9)    | -        | -        | -                      |

$p < 0.05$  was considered significant.

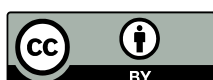

© 2017 by the authors. Submitted for possible open access publication under the terms and conditions of the Creative Commons Attribution (CC-BY) license (<http://creativecommons.org/licenses/by/4.0/>).
